# Supplementary material
Source: PubMed Central journal article supplement (PMC2838516)
Supplement: 00394.2009_1.pdf [file 00394.2009_1.pdf]

**Supplementary data to MS “Macrophage-mediated phagocytosis of apoptotic cholangiocytes  
contributes to reversal of biliary fibrosis” by Popov et al.**

**Supplementary table 1. Primers and probes used in quantitative RT-PCR (see M&M for details).**

| <b>Target gene</b>            | <b>5'-Primer</b>                   | <b>TaqMan probe</b>                  | <b>3'-Primer</b>               |
|-------------------------------|------------------------------------|--------------------------------------|--------------------------------|
| $\beta$ 2MG                   | CCGATGTATATGCTTGCAGAGTTAA          | AACCGTCACCTGGGACCGAGACATG<br>TA      | CAGATGATTCAGAGCTCCATA<br>GA    |
| procollagen<br>$\alpha$ 1(I)  | TCCGGCTCCTGCTCCTCTTA               | TTCTTGGCCATGCGTCAGGAGGG              | GTATGCAGCTGACTTCAGGGA<br>TGT   |
| procollagen<br>$\alpha$ 2(IV) | AGCTCCTGACCCCGAGGTTA               | ----                                 | AGCCCCACTGTCACAGTCG            |
| integrin $\beta$ 6            | AACGATCAAAGCCAAGTGG                | AAACGGGAACCAATCCGCTGTACCG            | TCTTAAAAGTGCTGGTGGAGC<br>CC    |
| TIMP-1                        | TCCTCTTGTGCTATCATTGATAGCTT         | TTCTGCAACTCGGACCTGGTTATAAG<br>G      | CGCTGGTATAAGGTGGTCTCG<br>AT    |
| TIMP-2                        | GCTGGACGTTGGAGGAAAGA               | TCTCCTTCCGCCTTCCCTGCAATTAG<br>A      | GCACAATAAAGTCACAGAGGG<br>TAAT  |
| TGF $\beta$ 1                 | AGAAGTCACCCGCGTGCTAA               | ACCGCAACAACGCAATCTATGACAAA<br>ACCA   | TCCCGAATGTCTGACGTATTGA         |
| TGF $\beta$ 2                 | CCAAGAGCTGGAGGCGAG                 | TCGCAGGTATCGATGGCACCTCC              | TTTCTGATCACCCTGGCATAT<br>G     |
| MMP-2                         | CCGAGGACTATGACCGGGATAA             | TCTGCCCCGAGACCGCTATGTCCA             | CTTGGTGGCCAGGAAAGTGAA<br>G     |
| MMP-3                         | CCGTTTCCATCTCTCTCAAGATGA           | AGATGGTATTCAATCCCTCTATGGAC<br>CTCC   | CAGAGAGTTAGATTTGGTGGG<br>TACCA |
| MMP-8                         | CCTAGTTTTCTTATTTAAAGGCAGACAGT<br>A | GCTGCAAGTCATAGGCACCTAGAGC<br>CCA     | ACTCCTTGGGAATCCATAGTTG<br>G    |
| MMP-9                         | CATGAAGACGACATAAAAAGGCATC          | CAGGTTTAGAGCCACGACCATACAG<br>ATGCT   | GGCTGGAGGCCTTGGG               |
| MMP-12                        | GCAGTGCCCCAGAGGTCA                 | AGATCCTGTAAGTGAGGTACCGCTTC<br>ATCCA  | CGCTCCAGACTTGAAAAGCTTT         |
| MMP-13                        | GGAAGACCCTCTTCTTCTCA               | TCTGGTTAGCATCATCATAACTCCAC<br>ACGT   | TCATAGACAGCATCTACTTTGT<br>C    |
| MMP-14                        | GAACCTTGACACCGTGGCCAT              | CAGAACCATCGCTCCTTGAAGACAAA<br>CATC   | CCGTCCATCACTTGTTATTCC<br>T     |
| $\alpha$ -SMA                 | GCTGACAGGATGCAGAAGGA               | CACCATGAAGATCAAGATTATTGCTC<br>CTCCAG | GCCGATCCAGACAGAATATTT<br>G     |
| PDGFR-B                       | TGGTCCTTTGGAATCCTACTCTG            | AAATCTTCACACTGGGTGGCACCCCT<br>T      | GGTCGTTTCATGGGCAGCT            |
| CTGF                          | ATCCCTGCGACCCACACAAG               | CTCCCCGCCAACCGCAAGAT                 | CAACTGCTTTGGAAGGACTCG<br>C     |
| PAI-1                         | GGCTCAGAACAACAAGTTCAACTACA         | TGAGTTCACCACTCCGGATGGGC              | CAGTTCAGGATGTCGTACTC<br>G      |
| uPA                           | TGACCCAGAGTGGAACAGATT              | GAGGTCCTCCTGAATCTCCCGAGCA            | GGGCGGCCATCGATG                |
| UPAR-1                        | CGGTGCATACAGTGCGAAAGT              | ----                                 | AGGTGCAGGATGCACACTCAA          |

**Supplementary Table 2. Dynamics of body and liver weight, and serum markers of inflammation and cholestasis during fibrosis induction and resolution.** Parameters were determined at sacrifice in rats after 4 weeks of BDL (BDL4w, n=6), and 3, 7, 14 days, 4 and 12 weeks after RY-anastomosis (RY3d, n=4, RY7, 14d, 4w and 12w, n=6, respectively). Sham-operated rats (Sham, n=8) served as normal controls.

|                             | <b>Sham</b> | <b>BDL 4w</b> | <b>RY 3d</b>             | <b>RY 7d</b>             | <b>RY 14d</b>            | <b>RY 4w</b>             | <b>RY 12w</b>           |
|-----------------------------|-------------|---------------|--------------------------|--------------------------|--------------------------|--------------------------|-------------------------|
| <b>ALT, U/l</b>             | 26.6±6.3    | 65.4±19.1*    | 21.1±6.5 <sup>+</sup>    | 33.0±4.1 <sup>+</sup>    | 35.1±14.7 <sup>+</sup>   | 41.8±7.4 <sup>+</sup>    | 44.5±8.2 <sup>+</sup>   |
| <b>AST, U/l</b>             | 163±12      | 750±127*      | 191±21 <sup>+</sup>      | 207±21 <sup>+</sup>      | 219±31 <sup>+</sup>      | 177±31 <sup>+</sup>      | 256±34 <sup>+</sup>     |
| <b>ALP, U/l</b>             | 156±36      | 371±62*       | 174±35 <sup>+</sup>      | 146±40 <sup>+</sup>      | 156±54 <sup>+</sup>      | 203±78 <sup>+</sup>      | 174±92 <sup>+</sup>     |
| <b>GGT, U/l</b>             | <2.5        | 57.2±19.0*    | <5 <sup>+</sup>          | <5 <sup>+</sup>          | <5 <sup>+</sup>          | <2.5 <sup>+</sup>        | <2.5 <sup>+</sup>       |
| <b>Bilirubin, µM/l)</b>     | 1.4±0.2     | 76.0±23.7*    | 9.6±2.4 <sup>+</sup>     | 4.5±1.5 <sup>+</sup>     | 1.9±0.7 <sup>+</sup>     | 2.0±0.4 <sup>+</sup>     | 2.3±0.8 <sup>+</sup>    |
| <b>Body weight, g</b>       | 405 ± 17    | 394 ± 13      | 388 ± 13                 | 402 ± 9                  | 417 ± 8                  | 429 ± 6                  | 436 ± 8                 |
| <b>Liver weight, g</b>      | 13.4 ± 1.7  | 34.3 ± 5.0*   | 24.3 ± 2.2 <sup>+</sup>  | 20.3 ± 1.6 <sup>+</sup>  | 18.3 ± 3.4 <sup>+</sup>  | 15.7 ± 2.0 <sup>+</sup>  | 15.2 ± 2.4 <sup>+</sup> |
| <b>Liver/body weight, %</b> | 3.30 ± 0.32 | 8.70 ± 0.98*  | 6.24 ± 0.38 <sup>+</sup> | 5.06 ± 0.31 <sup>+</sup> | 4.39 ± 0.75 <sup>+</sup> | 3.64 ± 0.41 <sup>+</sup> | 3.48 ± 0.5 <sup>+</sup> |

\* - p<0.05 compared to sham-operated group; <sup>+</sup> - p<0.05 compared to the peak fibrosis group (BDL4w).

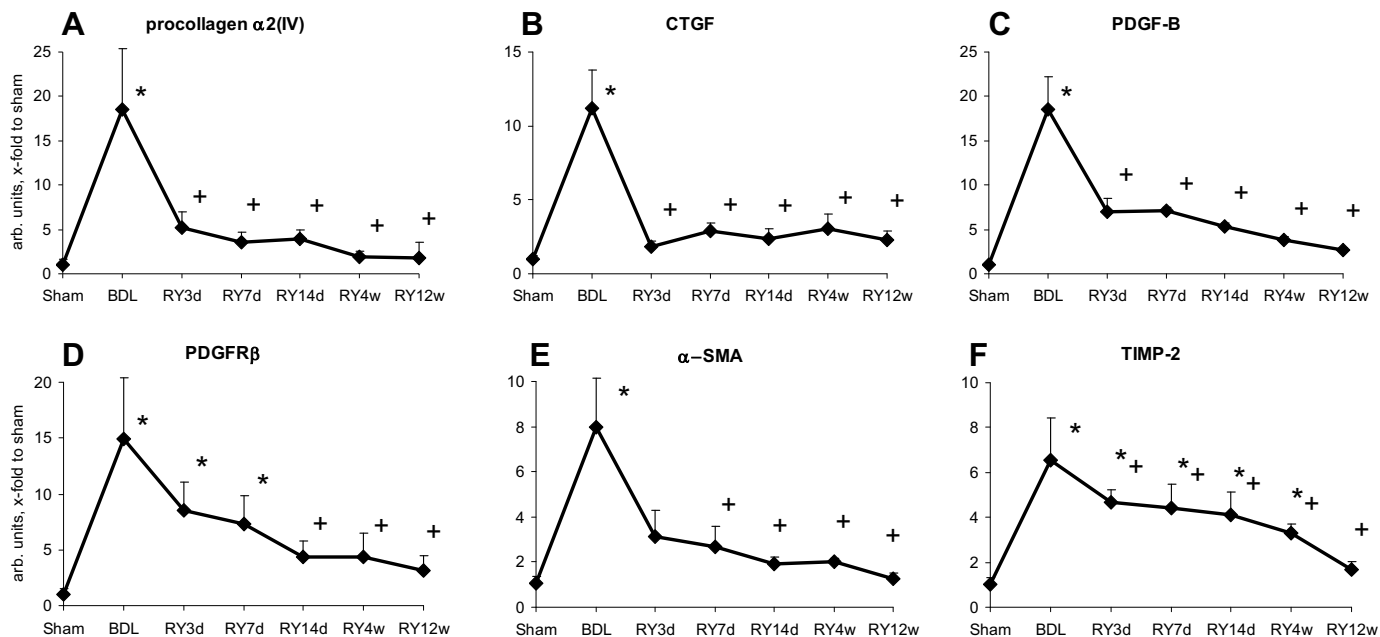

**Supplementary figure 1. Two distinct profibrogenic transcript profiles during fibrosis progression and reversal.** “Cholangiocyte-specific” transcripts: procollagen  $\alpha 2(IV)$  (A), connective tissue growth factor CTGF (B), platelet derived growth factor B PDGF-B (C) which are rapidly downregulated after RY-anastomosis; “HSC/MF-specific” transcripts: PDGF receptor beta (PDGFR- $\beta$ ) (D),  $\alpha$ -SMA (E) and TIMP-2 (F) which show a delayed downregulation. Quantification by Real Time quantitative PCR (see also Fig.2 of main manuscript and references 33, 35, 32, 21, 36 in main manuscript for cellular sources of respective transcripts) was performed in total hepatic RNA. Data are expressed as means $\pm$ SEM, and in arbitrary units relative to  $\beta 2MG$  mRNA (fold change vs. sham-operated controls). \* $p < 0.05$  compared to the sham-operated group; + $p < 0.05$  compared to the peak of fibrosis group (BDL).

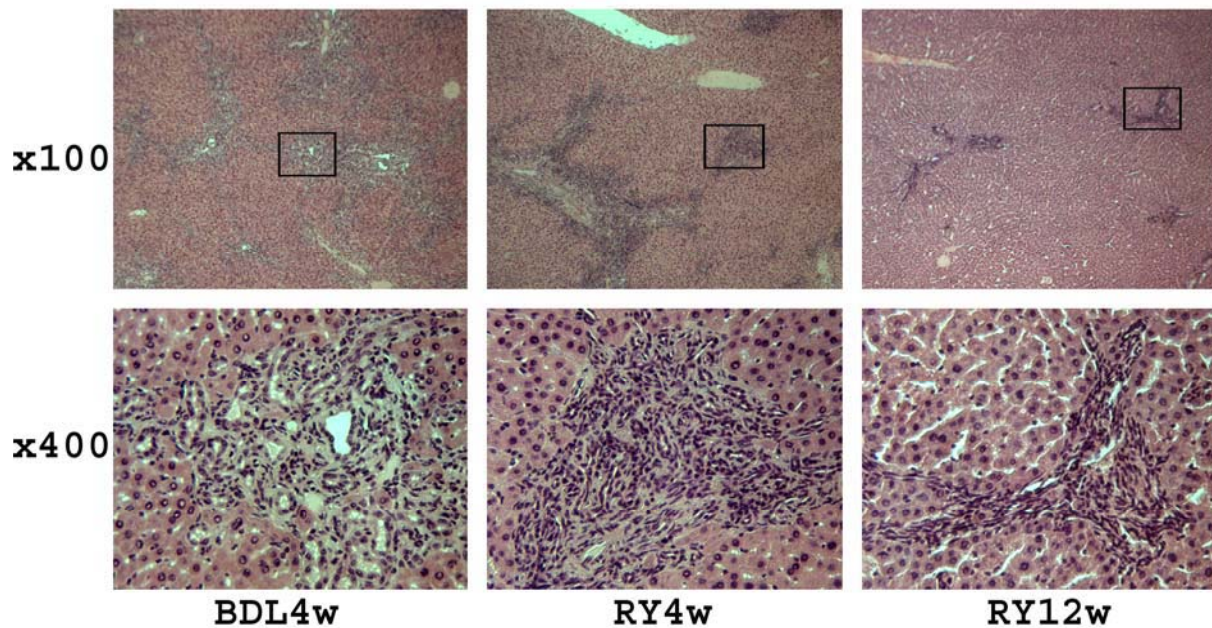

**Supplementary figure 2. Portal and septal areas are densely populated with cells throughout reversal of biliary fibrosis.** Reversal of BDL-induced fibrosis after RY-anastomosis. Portal and septal areas become “hypercellular” during reversal. Hypercellularity persists even in the remaining mildly enlarged portal tract at week 12 of reversal, indicating that remodeling of the scar is a cell-mediated process. While  $\alpha$ -SMA is readily detected in activated HSC/MF around proliferating bile ducts at the peak of BDL-fibrosis, septal cells lose positivity of the HSC activation marker  $\alpha$ -SMA immediately (at day 3) after RY-anastomosis (data not shown). Representative pictures, H&E staining.

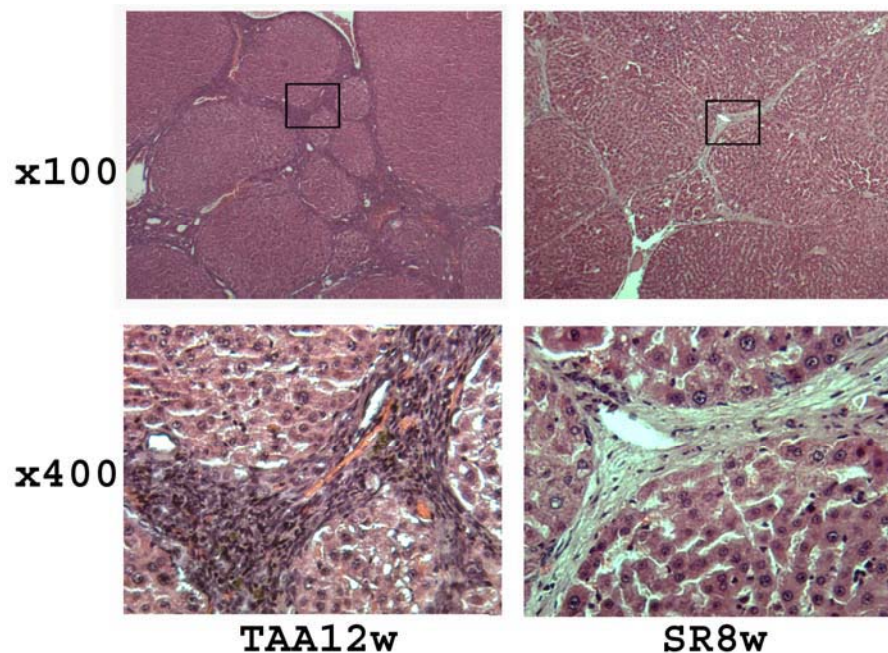

**Supplementary figure 3. Septa become depopulated in “irreversible” liver fibrosis.** Hepatotoxin-induced rat liver fibrosis was induced by intraperitoneal thioacetamide (TAA) injection (200mg/kg twice weekly for 12 weeks) and animals were allowed to recover for additional 8 weeks as described before (Popov et al. 2006 ref. 6, main manuscript). Septal areas are highly populated at peak of TAA-

fibrosis (TAA12w) but become “hypocellular” 8 weeks after TAA discontinuation (SR8w). There is no spontaneous reversal after 8w of TAA withdrawal (Popov et al, 2006, ref. 6, main manuscript). These findings are similar to findings reported in incomplete reversal of advanced CCl<sub>4</sub>-induced fibrosis in rats (Issa et al, 2004, ref. 8, main manuscript). Representative pictures, H&E staining.

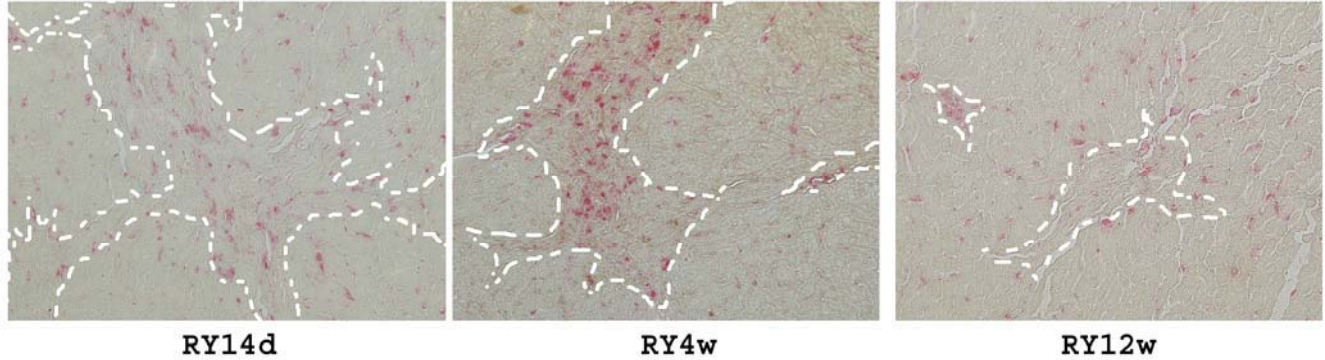

**Supplementary figure 4. Increase in CD68+ cells in scarred portal tracts indicates active macrophage recruitment at the peak of reversal (RY4w).** The connective tissue area in each representative picture is highlighted by a broken white line. Note that there is no change in the number and distribution of resident macrophages (Kupffer cells) in the parenchyma. Immunohistochemistry for CD68 (macrophage marker, red). Original magnification x20.



**A**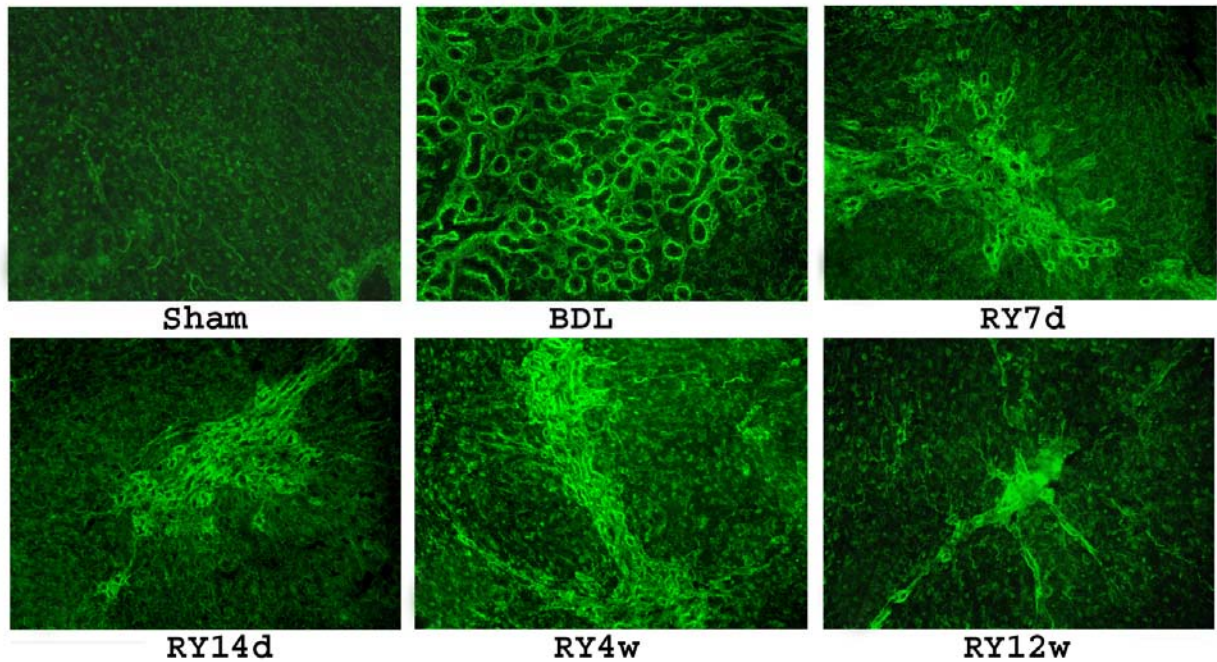

Endogenously active and total MMP-2 in liver homogenate

**B**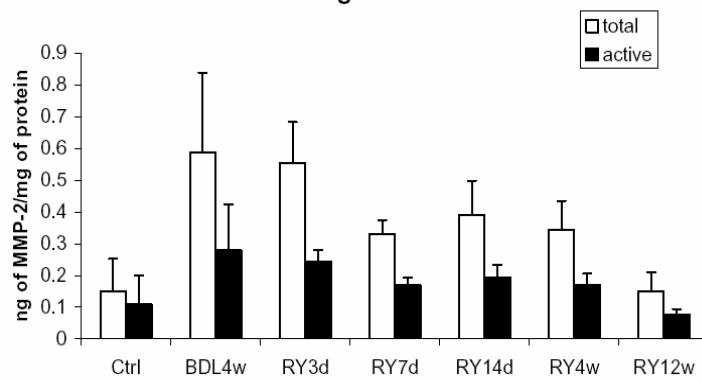

**Supplementary figure 5. A: Mapping of gelatinase activity** by in situ zymography reveals its association with the portal connective tissue at any time-point tested: representative images, magnification x200. **B: MMP-2 expression and activity declines during fibrosis reversal.** Total and active forms of MMP-2 in liver homogenates were determined by an ELISA-based activity assay (MMP-2 Biotrack Assay, Amersham, UK) after normalization to total protein content. See also Fig. 5A in the main manuscript for the corresponding MMP-2 zymography and Fig. 5B MMP-2 mRNA levels in total hepatic RNA.
